# Supplementary material for: Quantitative analysis of two adulterants in Cynanchum stauntonii by near-infrared spectroscopy combined with -variate calibrations
Source: Springer Nature journal article supplement (doi:10.1186/s12873-020-00356-5), 2012-01-01
Supplement: MOESM1 [file 18317418]

## Appendix A: search strategy

| Database         | Concept                                                                                                                                                                                                                                                            |                                                                                                                                                                                                                                                                                                                                                                                           |                                                                                                                                                                                                 |                                                                                                                                                                                             |
|------------------|--------------------------------------------------------------------------------------------------------------------------------------------------------------------------------------------------------------------------------------------------------------------|-------------------------------------------------------------------------------------------------------------------------------------------------------------------------------------------------------------------------------------------------------------------------------------------------------------------------------------------------------------------------------------------|-------------------------------------------------------------------------------------------------------------------------------------------------------------------------------------------------|---------------------------------------------------------------------------------------------------------------------------------------------------------------------------------------------|
|                  | Rural/remote                                                                                                                                                                                                                                                       | Time                                                                                                                                                                                                                                                                                                                                                                                      | Acute myocardial infarction                                                                                                                                                                     | Emergency                                                                                                                                                                                   |
| Scopus           | 1.ALL ("rural health" OR "RURAL POPULATION" OR "RURAL nursing" OR "RURAL health services")<br>2._ALL (remot* OR rural*)                                                                                                                                            | 1._ALL ("transit* tim*" OR "tim* transit*")<br>2. ALL ("transport* tim*" OR "tim*transport*")<br>3. ALL ("tim* to hospital*")<br>4._ALL ("tim* to treat*" OR "treat* tim*")<br>5. ALL ("prehospital* time*" OR "or pre-hospital*time*")<br>6._ALL ("deliver*tim*")<br>7._ALL ("time factors")<br>8._ALL ("tim* element*")<br>9._ALL ("tim*critical*")                                     | ALL ("Cardiovascular Diseases" OR "Coronary Disease" OR "Coronary Artery Disease" OR "Myocardial Infarction")                                                                                   | 1.ALL (ambulance OR "emergency health service" OR "paramedical personnel" OR "rescue personnel" OR "emergency care")<br>2.ALL (ambulanc* OR paramedic* OR para-medic* )                     |
| Medline/Embase   | 1.exp RURAL HEALTH/ or RURAL POPULATION/ or exp HOSPITALS, RURAL/ or exp RURAL NURSING/ or exp RURAL HEALTH SERVICES/<br><br>2. (remot* or rural*).af.                                                                                                             | 1. (transit* tim* or tim* transit*).af.<br>2. (transport* tim* or tim* transport*).af.<br>3. tim* to hospital*.af.<br>4. (tim* to treat* or treat* tim*).af.<br>5. prehospital* time* or pre-hospital*time*).af.<br>6. deliver*time*.af.<br>7. exp Time Factors/<br>8. exp TIME/<br>9. tim* element*.af.<br>10. time critical*.af.                                                        | 1.exp Myocardial Infarction/<br><br>2.exp Cardiovascular Diseases/ or exp Coronary Disease/ or exp Coronary Artery Disease/                                                                     | 1. exp ambulance/<br>2. exp emergency health service/ or exp paramedical personnel/ or exp rescue personnel/<br>3. exp emergency care/<br>4. (ambulanc* or paramedic* or para-medic*).af.   |
| Cochrane library | 1. MeSH descriptor: [Rural Health] explode all trees<br><br>2. RURAL POPUL* (Word variations have been searched)<br><br>3. RURAL nur*<br><br>4. RURAL health service*<br>5. health service* rural*<br><br>6. remot* or rural* (Word variations have been searched) | 1."tim* transit*" or "transit* tim*"<br>2."time to hospital*" or "time to admiss*"<br>3."transport* tim*" or "tim* transport*"<br>4."tim* element*" or "element* tim*"<br>5."treat* tim*" or "tim* treat*"<br>6."tim* critic*" or "crit* tim*"<br>7."prehospital* Tim*" or "pre-hospital* tim*"<br>8."deliver* tim*"<br>9. MeSH descriptor: [Time Factors]<br>10. MeSH descriptor: [Time] | 1.MeSH descriptor: [Myocardial Infarction]<br><br>2.MeSH descriptor: [Cardiovascular Diseases]<br><br>3.MeSH descriptor: [Coronary Disease]<br><br>4.MeSH descriptor: [Coronary Artery Disease] | 1.MeSH descriptor: [Ambulances]<br><br>2.MeSH descriptor: [Emergency Medical Services]<br><br>3.MeSH descriptor: [Allied Health Personnel]<br><br>4. ambulanc* or paramedic* or para-medic* |
